# Supplementary material for: The complete genome sequence of the rumen methanogen Methanosarcina barkeri CM1
Source: PubMed Central journal article supplement (PMC4582637; doi:10.1186/s40793-015-0038-5), 2015-08-19
Supplement: 40793_2015_38_MOESM1_ESM.pdf [file 40793_2015_38_MOESM1_ESM.pdf]

## Appendix 1

**Table S1.** Associated MIGS record

| MIGS-ID       | field name                     | description                          |
|---------------|--------------------------------|--------------------------------------|
| <b>MIGS-1</b> | Submit to INSDC/Trace archives |                                      |
| 1.1           | PID                            |                                      |
| 1.2           | Trace Archive                  |                                      |
| <b>MIGS-2</b> | MIGS CHECK LIST TYPE           |                                      |
| <b>MIGS-3</b> | Project Name                   | <i>Methanosarcina barkeri</i><br>CM1 |
| <b>MIGS-4</b> | Geographic Location            | Palmerston North, New Zealand        |
| 4.1           | Latitude                       | -40.35 (40°21'00"S)                  |
| 4.2           | Longitude                      | +175.61 (175°36'36"E)                |
| 4.3           | Depth                          | NA                                   |
| 4.4           | Altitude                       | 30m                                  |
| <b>MIGS-5</b> | Time of Sample collection      | Not reported                         |
| <b>MIGS-6</b> | Habitat (EnvO)                 | Cow rumen                            |
| 6.1           | temperature                    | 37-39°C                              |
| 6.2           | pH                             | 6.8                                  |
| 6.3           | salinity                       |                                      |
| 6.4           | chlorophyll                    |                                      |
| 6.5           | conductivity                   |                                      |
| 6.6           | light intensity                |                                      |
| 6.7           | dissolved organic carbon (DOC) |                                      |
| 6.8           | current                        |                                      |
| 6.9           | atmospheric data               |                                      |
| 6.10          | density                        |                                      |
| 6.11          | alkalinity                     |                                      |
| 6.12          | dissolved oxygen               |                                      |

|                |                                            |                                                                     |
|----------------|--------------------------------------------|---------------------------------------------------------------------|
| 6.13           | particulate organic carbon (POC)           |                                                                     |
| 6.14           | phosphate                                  |                                                                     |
| 6.15           | nitrate                                    |                                                                     |
| 6.16           | sulfates                                   |                                                                     |
| 6.17           | sulfides                                   |                                                                     |
| 6.18           | primary production                         |                                                                     |
| <b>MIGS-7</b>  | Subspecific genetic lineage                | Strain CM1                                                          |
| <b>MIGS-9</b>  | Number of replicons                        | 1                                                                   |
| <b>MIGS-10</b> | Extrachromosomal elements                  | 0                                                                   |
| <b>MIGS-11</b> | Estimated Size                             | 4501171bp                                                           |
| <b>MIGS-12</b> | Reference for biomaterial or Genome report |                                                                     |
| <b>MIGS-13</b> | Source material identifiers                | Bovine rumen contents                                               |
| <b>MIGS-14</b> | Known Pathogenicity                        | Not known as a pathogen                                             |
| <b>MIGS-15</b> | Biotic Relationship                        | Rumen symbiont                                                      |
| <b>MIGS-16</b> | Specific Host                              | Bovine                                                              |
| <b>MIGS-17</b> | Host specificity or range (taxid)          | Ruminants                                                           |
| <b>MIGS-18</b> | Health status of Host                      | Healthy                                                             |
| <b>MIGS-19</b> | Trophic Level                              | Methanogen                                                          |
| <b>MIGS-22</b> | Relationship to Oxygen                     | Strict anaerobe                                                     |
| <b>MIGS-23</b> | Isolation and Growth conditions            | Cultured from a cow rumen sample                                    |
| <b>MIGS-27</b> | Nucleic acid preparation                   | Freeze grinding                                                     |
| <b>MIGS-28</b> | Library construction                       | 3Kb mate paired end (454)/<br>170bp insert paired-end<br>(illumina) |
| <b>28.1</b>    | Library size                               | 436687130bp (454)/<br>1007000100bp (illumina)                       |
| <b>28.2</b>    | Number of reads                            | 1494961 (454)/ 11188890<br>(illumina)                               |
| <b>28.3</b>    | vector                                     | NA                                                                  |

|                |                       |                           |
|----------------|-----------------------|---------------------------|
| <b>MIGS-29</b> | Sequencing method     | Pyrosequencing/illumina   |
| <b>MIGS-30</b> | Assembly              | Newbler, Spades           |
| <b>30.1</b>    | Assembly method       |                           |
| <b>30.2</b>    | estimated error rate  |                           |
| <b>30.3</b>    | method of calculation |                           |
| <b>MIGS-31</b> | Finishing strategy    | Closed                    |
| <b>31.1</b>    | Status                |                           |
| <b>31.2</b>    | coverage              |                           |
| <b>31.3</b>    | contigs               |                           |
| <b>MIGS-32</b> | Relevant SOPs         | 97x (454)/224x (illumina) |
| <b>MIGS-33</b> | Relevant e-resources  |                           |
|                |                       | 1                         |

## Appendix 2.

**Table S2. GenBank Accession Summary**

| GenBank Accession | Summary                                                                                                                                                                                                                                                                                                                                                                                                                                                                     |
|-------------------|-----------------------------------------------------------------------------------------------------------------------------------------------------------------------------------------------------------------------------------------------------------------------------------------------------------------------------------------------------------------------------------------------------------------------------------------------------------------------------|
| CP008746          | CP008746.1 is a bacterial sequences record containing circular, double-stranded DNA (4,501,171 bases) from <i>Methanosarcina barkeri</i> strain CM1. The record was created on June 3, 2015. It contains 7,248 features, including 3655 genes with 632 distinct annotations, 3523 DNA coding regions, 9 rRNA features (16S ribosomal RNA, 5S ribosomal RNA and 23S ribosomal RNA) and 60 tRNA features coding for 20 distinct amino acids.                                  |
| AE010299          | AE010299.1 is a bacterial sequences record containing circular, double-stranded DNA (5,751,492 bases) from <i>Methanosarcina acetivorans</i> strain C2A. The record was created on April 3, 2002 and last updated October 1, 2014. It contains 9,213 features, including 4662 genes with 687 distinct annotations, 4540 DNA coding regions, 10 rRNA features (16S ribosomal RNA, 5S ribosomal RNA, 7S ribosomal RNA and 23S ribosomal RNA).                                 |
| CP004144          | CP004144.1 is a bacterial sequences record containing circular, double-stranded DNA (3,427,949 bases) from <i>Methanosarcina mazei</i> strain Tuc01. The record was created on February 22, 2013 and last updated January 31, 2014. It contains 6,746 features, including, 3252 DNA coding regions, 9 rRNA features (16S ribosomal RNA, 5S ribosomal RNA and 23S ribosomal RNA) and 40 tRNA features coding for 19 distinct amino acids.                                    |
| AE008384          | AE008384.1 is a bacterial sequences record containing circular, double-stranded DNA (4,096,345 bases) from <i>Methanosarcina mazei</i> strain Go1. The record was created on May 20, 2002 and last updated January 30, 2014. It contains 6,877 features, including 3438 genes with 145 distinct annotations, 3371 DNA coding regions, 10 rRNA features (LSU Ribosomal RNA, SSU ribosomal RNA and 5S Ribosomal RNA) and 57 tRNA features coding for 20 distinct amino acids. |
| NC_020892         | NC_020892.1 is a contig record containing circular, double-stranded DNA (1,461,105 bases) from <i>Thermoplasmatales</i> archaeon strain BRNA1. The record was created on April 3, 2013                                                                                                                                                                                                                                                                                      |

|           |                                                                                                                                                                                                                                                       |
|-----------|-------------------------------------------------------------------------------------------------------------------------------------------------------------------------------------------------------------------------------------------------------|
|           | and last updated December 18, 2014. It contains 1 feature.                                                                                                                                                                                            |
| NC_007355 | NC_007355.1 is a contig record containing circular, double-stranded DNA (4,837,408 bases) from <i>Methanosarcina barkeri</i> str. strain Fusaro. The record was created on August 22, 2005 and last updated December 16, 2014. It contains 1 feature. |
